# Supplementary material
Source: PubMed Central journal article supplement (PMC2799724)
Supplement: 0905431106_0905431106SI.pdf [file 0905431106_0905431106SI.pdf]

# Supporting Information

Krentz et al. 10.1073/pnas.0905431106

## SI Text

**Bisulfite Sequencing.** GFP positive E13.5 germ cells from *Dmrt1*<sup>-/-</sup> *Oct4* $\Delta$ PE:GFP<sup>+</sup> males were sorted into RNAProtect (Qiagen) by using a FACSDiva cell sorter. DNA was prepared by using AllPrep Micro kit (Qiagen) and bisulfate-treated by using EpiTect Bisulfite kit (Qiagen). *H19*, *Lit1*, and *Xist* loci were amplified and sequenced as described in ref. 1 and analyzed by using CpG Viewer (2).

**Array Comparative Genome Hybridization (CGH).** DNA was phenol:chloroform:isoamyl alcohol-extracted from adult 129Sv wild-type and 129Sv *Dmrt1*<sup>-/-</sup> testes and spleen tissue and from adult B6 wild-type and B6 *Dmrt1*<sup>-/-</sup> testes. CGH was carried out on an Agilent mouse genome 4 × 44 K oligonucleotide microarray.

**Expression Array Data Analysis.** Cel files were normalized by using the GC-RMA algorithm (3) as implemented in the Genedata Expressionist Software Package. Affymetrix probe set ID's were converted to Entrez Gene Symbols by using Affymetrix mappings for the array. Two group *t* tests were carried out to determine genes that were differentially expressed between genotypes. Genes found to have a *P* value <0.05 and an average fold change of greater than absolute value of 2 are included in the figure. Gene profiles in *Dmrt1*<sup>-/-</sup> are shown relative to the expression pattern observed in wild-type.

1. Hajkova P, et al. (2002) Epigenetic reprogramming in mouse primordial germ cells. *Mech Dev* 117:15–23.
2. Carr IM, Valleley EM, Cordery SF, Markham AF, Bonthon DT (2007) Sequence analysis and editing for bisulfite genomic sequencing projects. *Nucleic Acids Res* 35:e79.
3. Wu Z, Irizarry R, Gentleman R, Martinez-Murillo F, Spencer F (2004) A model-based background adjustment for oligonucleotide expression arrays. *J Am Stat Assoc* 99:909–917.
4. Ancelin K, et al. (2006) Blimp1 associates with Prmt5 and directs histone arginine methylation in mouse germ cells. *Nat Cell Biol* 8:623–630.
5. Looijenga LH, et al. (2006) Genomic and expression profiling of human spermatocytic seminomas: Primary spermatocyte as tumorigenic precursor and DMRT1 as candidate chromosome 9 gene. *Cancer Res* 66:290–302.

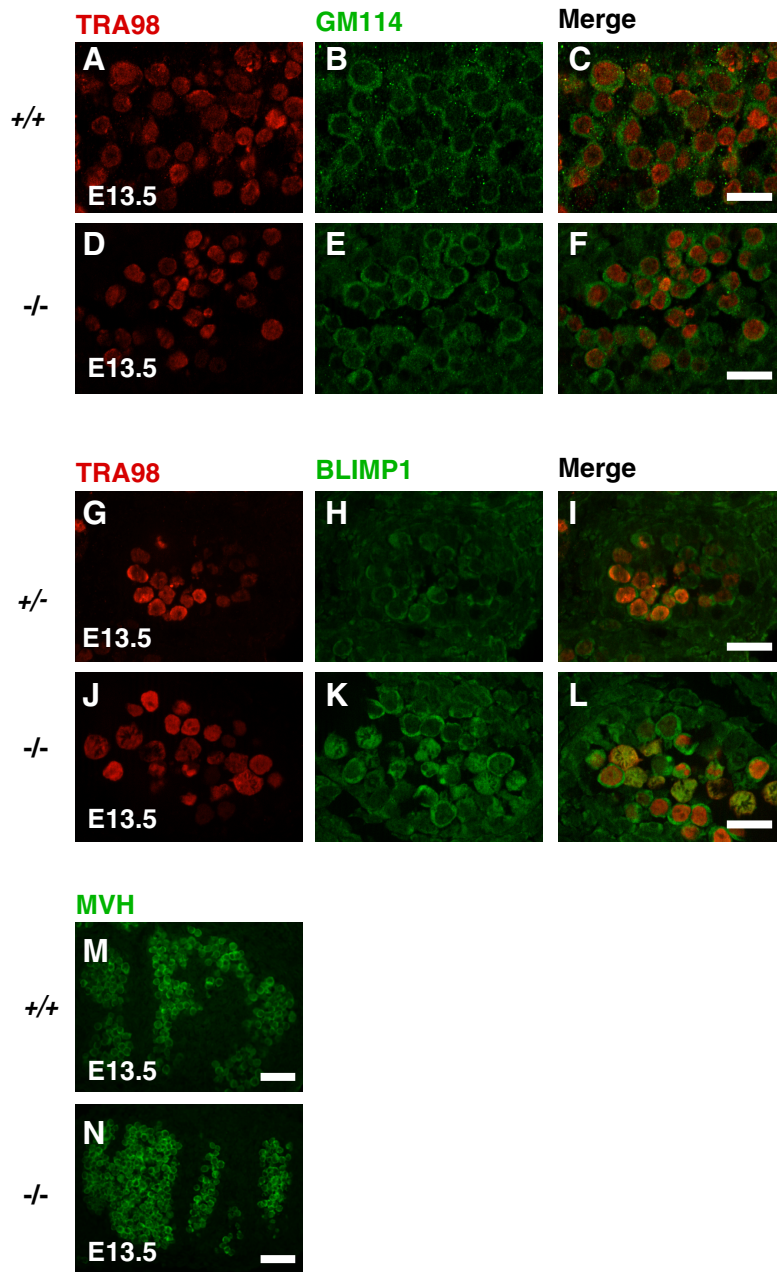

**Fig. S1.** Early gonocyte developmental markers are normal in *Dmrt1* mutant germ cells. (A–F) GM114 is expressed at similar levels in germ cells of *Dmrt1* mutants and wild-type controls. (G–L) BLIMP1 translocation to the cytoplasm (4) is complete by E13.5. (M and N) Similar numbers of MVH positive germ cells are present in *Dmrt1* mutant testes compared to wild-type controls. In addition, the number of germ cells (MVH+) was counted for 50 tubules for *Dmrt1*<sup>-/-</sup> (avg = 5.0, SD = 0.5) and wild-type (avg = 4.8, SD = 0.3) at P0;  $P = 0.69$  ( $n = 2$ ). (Scale bars, 50  $\mu\text{m}$ .)

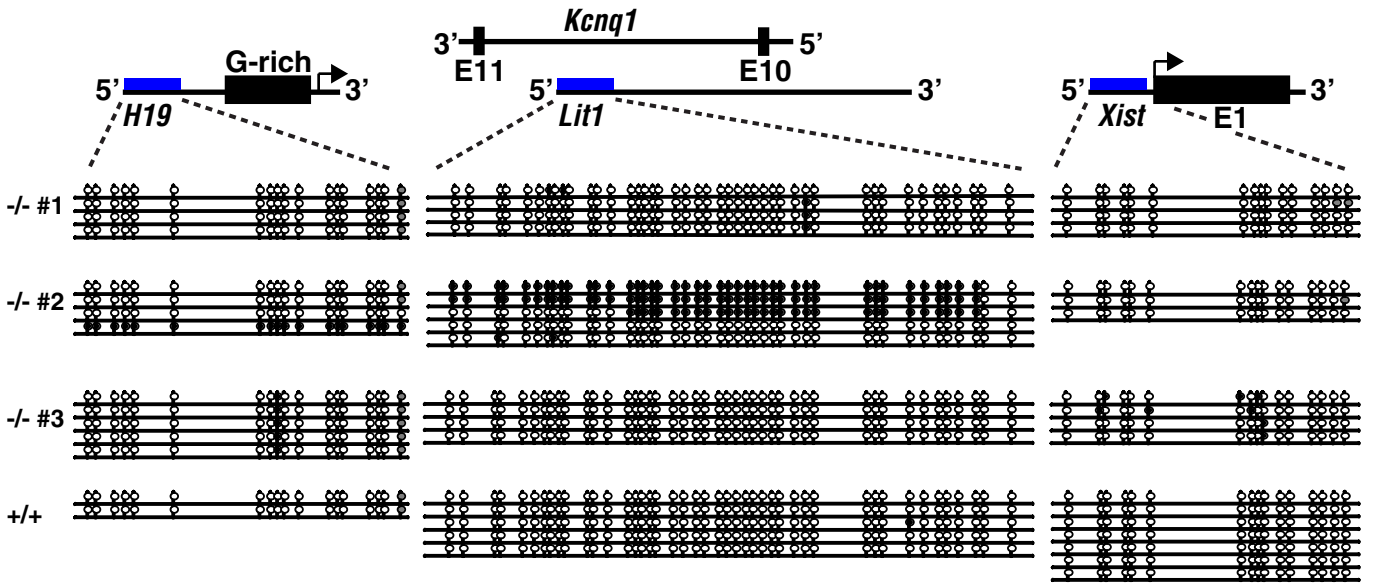

**Fig. S2.** Parental imprinting is mostly erased by E13.5 in *Dmrt1* mutant germ cells. Methylation of the paternally imprinted locus *H19* (Left) and the maternally imprinted locus *Lit1* within the *Kcnq1* gene (Center) is erased in *Dmrt1* mutant germ cells. The *Xist* locus (Right) underwent normal demethylation by E13.5 in *Dmrt1* mutant germ cells. *Dmrt1*<sup>-/-</sup> mutant #2 had not completed parental imprinting erasure by E13.5. Open circles, unmethylated; black filled circles, methylated; gray circles, sequence did not align to reference.

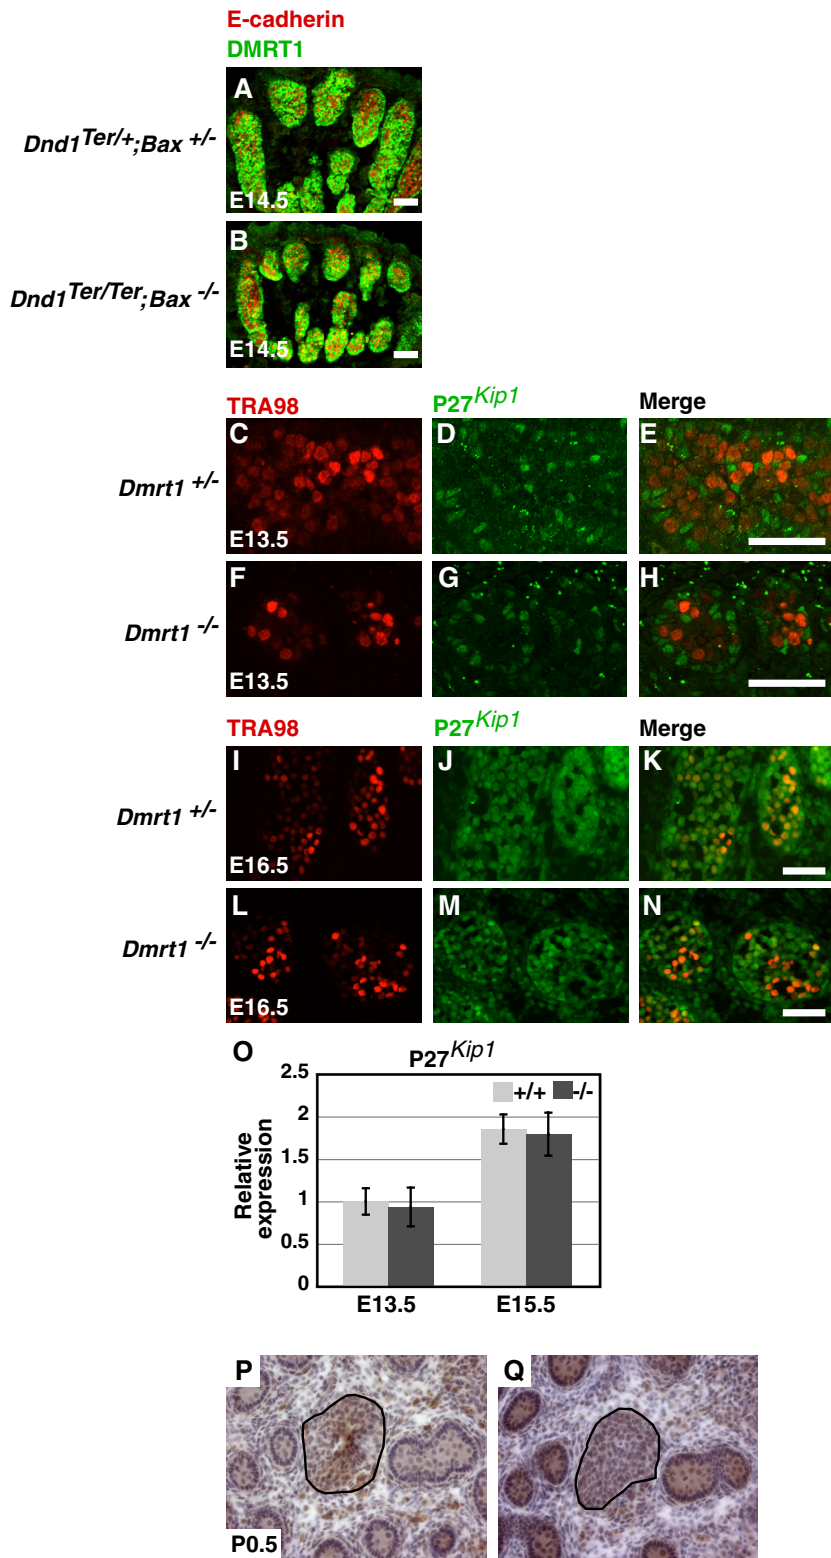

**Fig. S3.** *Dmrt1* likely acts independently of *Dnd1*. (A and B) DMRT1 is expressed at similar levels in *Dnd1<sup>Ter/Ter</sup>;Bax<sup>-/-</sup>* and *Dnd1<sup>Ter/+</sup>;Bax<sup>+/-</sup>* germ cells at E14.5. Germ cells are marked with E-cadherin, which is expressed in all germ cells at this stage. (C–N) Double staining for the germ cell marker TRA98 and the cell cycle inhibitor P27<sup>Kip1</sup> at E13.5 (C–H) and E16.5 (I–N). P27<sup>Kip1</sup> is expressed in *Dmrt1* mutant germ cells at a similar level compared to heterozygous control germ cells at E13.5 and E16.5. (Scale bars, 50  $\mu$ m.) (O) P27<sup>Kip1</sup> is expressed in E13.5 and E15.5 *Dmrt1<sup>-/-</sup>* gonads at similar levels to wild-type controls. Expression was normalized to *Hprt*. Error bars: SD from three animals of each genotype. (P and Q) Serial sections of *Dmrt1<sup>-/-</sup>* gonad at P0.5. (P) PTEN and (Q) P-AKT Thr-308 are expressed at similar levels in EC cluster, outlined in black, compared to adjacent tubules.

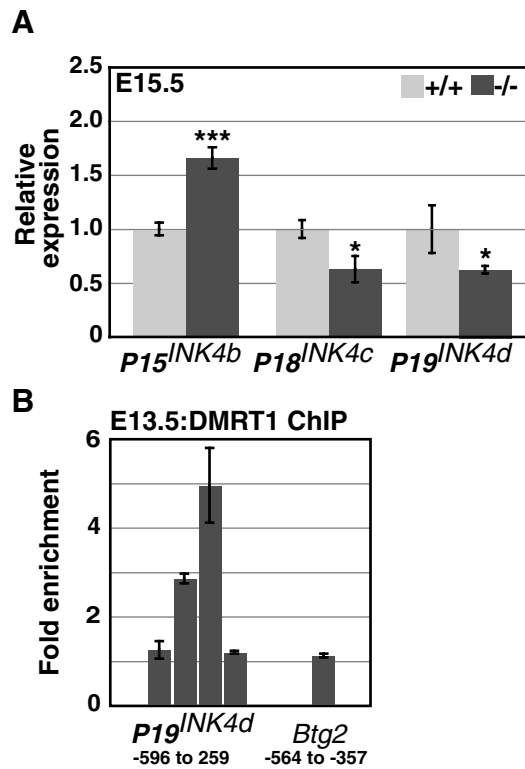

**Fig. S4.** DMRT1 regulates *P15<sup>INK4b</sup>*, *P18<sup>INK4c</sup>*, and *P19<sup>INK4d</sup>*. (A) *Dmrt1*<sup>-/-</sup> testes have elevated expression of *p15<sup>INK4b</sup>* and have reduced expression of *P18<sup>INK4c</sup>* and *P19<sup>INK4d</sup>* relative to wild-type controls at E15.5 based on qRT-PCR. Expression is normalized to *Hprt* expression. Error bars: SD from three animals of each genotype. \*,  $P < 0.05$ ; \*\*\*,  $P < 0.0005$ . (B) DMRT1 binds to *P19<sup>INK4d</sup>* promoter in E13.5 testes. ChIP-qPCR of *P19<sup>INK4d</sup>* and *Btg2* regulatory regions, comparing enrichment in chromatin immunoprecipitated with DMRT1 relative to input chromatin. Numbering below gene name indicates region covered by amplicons tested, relative to start of transcription. Error bars: SD of duplicate qPCR of sample. The negative control promoter *Btg2* was chosen because it is expressed at similar levels in germ cells and Sertoli cells and does not change expression in *Dmrt1* mutant testes.

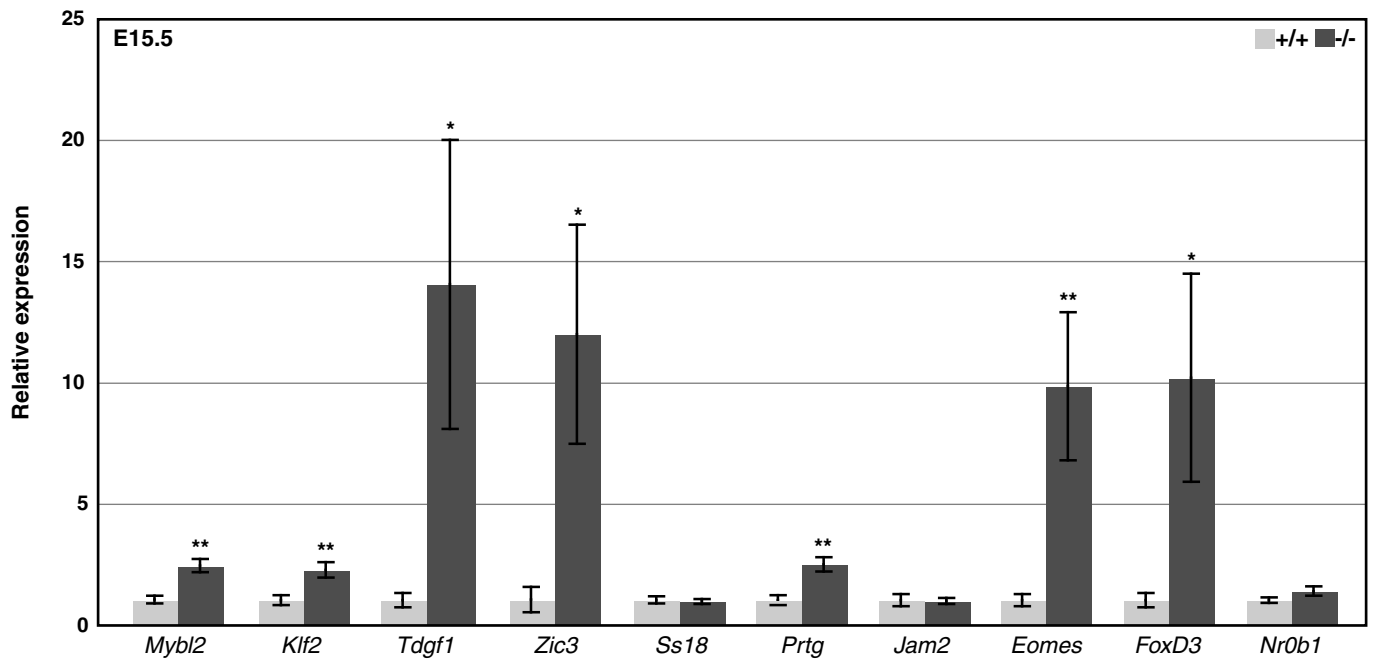

**Fig. S5.** Early direct response genes of OCT3/4 are overexpressed in *Dmrt1*<sup>-/-</sup> gonads. Seven out of 10 genes examined by qRT-PCR were significantly up-regulated in *Dmrt1*<sup>-/-</sup> gonads compared to wild-type at E15.5. Expression was normalized to *Hprt*. Error bars: SD from three animals of each genotype. \*, *P* < 0.05; \*\*, *P* < 0.005.

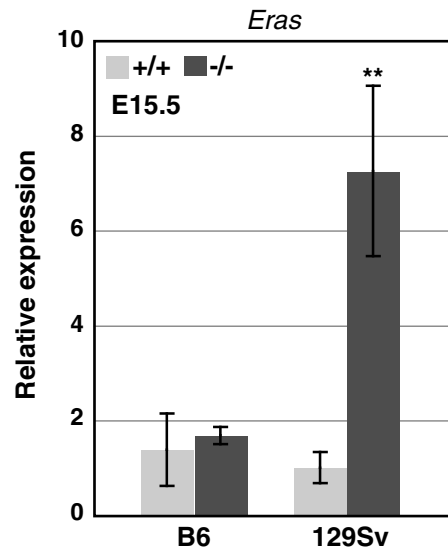

**Fig. S6.** *Eras* is significantly up-regulated in 129Sv *Dmrt1*<sup>-/-</sup> gonads relative to 129Sv wild-type and B6 gonads of either genotype. Expression was normalized to *Hprt*. Error bars: SD from three animals of each genotype. \*\*,  $P < 0.005$ .

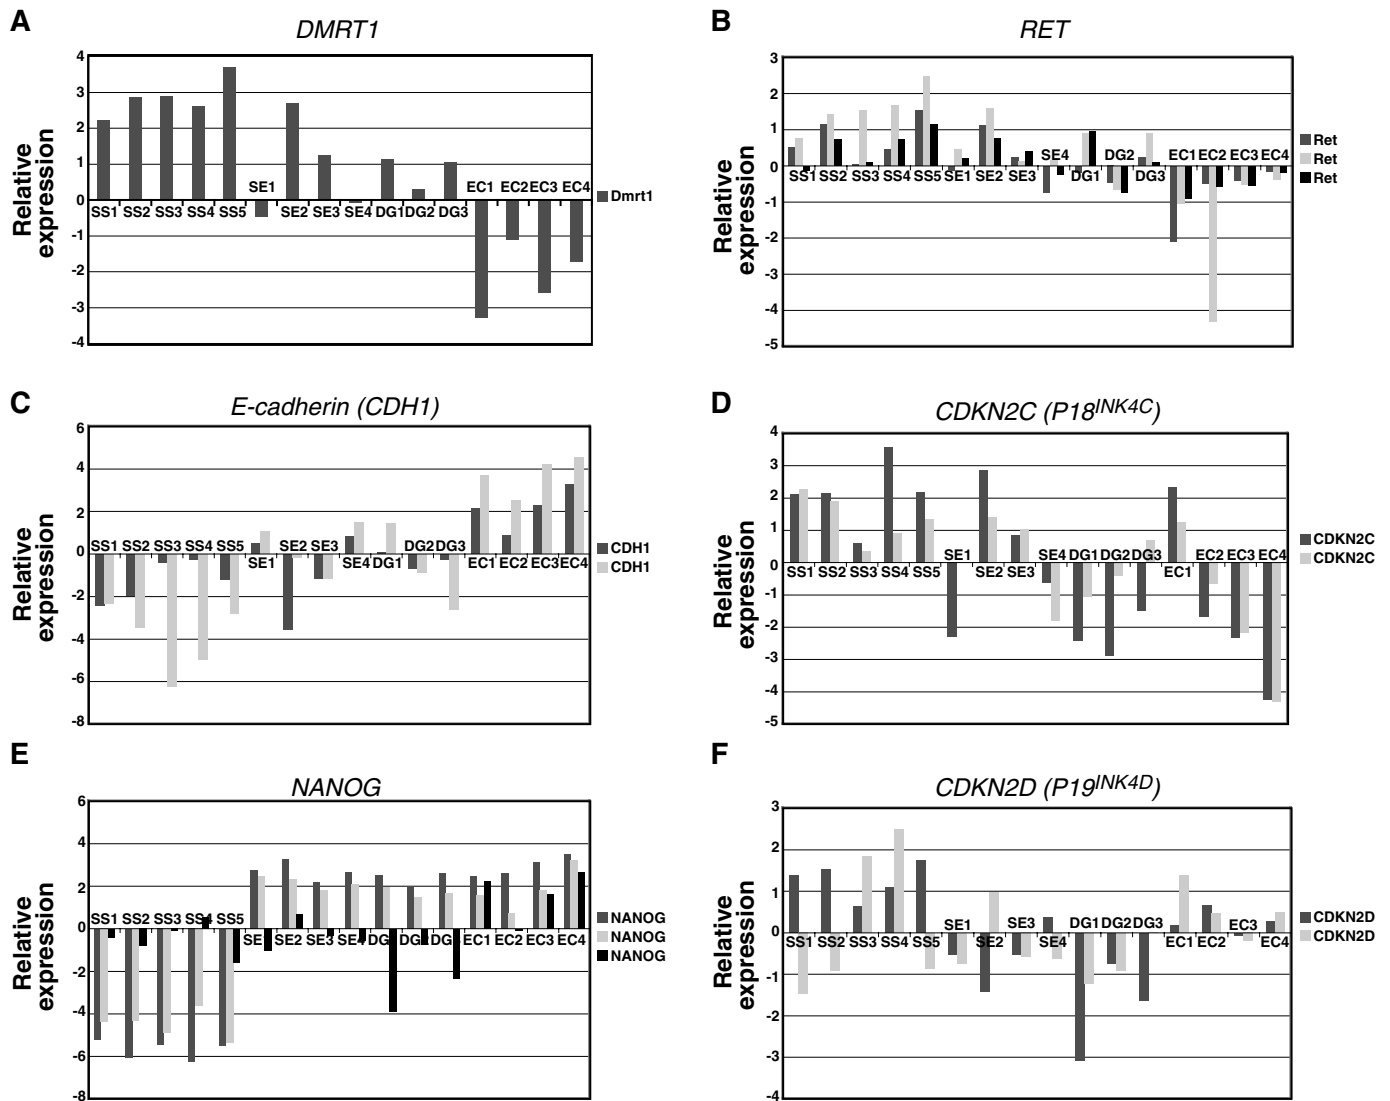

**Fig. S7.** Gene expression in human germ cell tumors correlates with *DMRT1* expression level. Expression profiling of spermatocytic seminomas (SS), seminomas (SE), dysgerminomas (DG), and embryonal carcinomas (EC). (A) *DMRT1*, (B) *RET*, (C) *E-CADHERIN/CDH1*, (D) *CDKN2C (P18<sup>INK4C</sup>)*, (E) *NANOG*, and (F) *CDKN2D (P19<sup>INK4D</sup>)*. Tumor samples with high *DMRT1* expression (SS1–5, SE2) also have high *RET*, *CDKN2C*, and *CDKN2D* expression and reduced *E-CADHERIN* expression. EC cells have low *DMRT1* expression and have low *RET* and *CDKN2C* expression and elevated *E-CADHERIN* expression. *NANOG* expression was reduced in SS and elevated in SE, DG, and EC. Relative expression was determined in relation to the geometric mean of hybridization intensities for each patient sample. Differences in relative expression represent deviations from the geometric mean (5).



## Chromosome 19

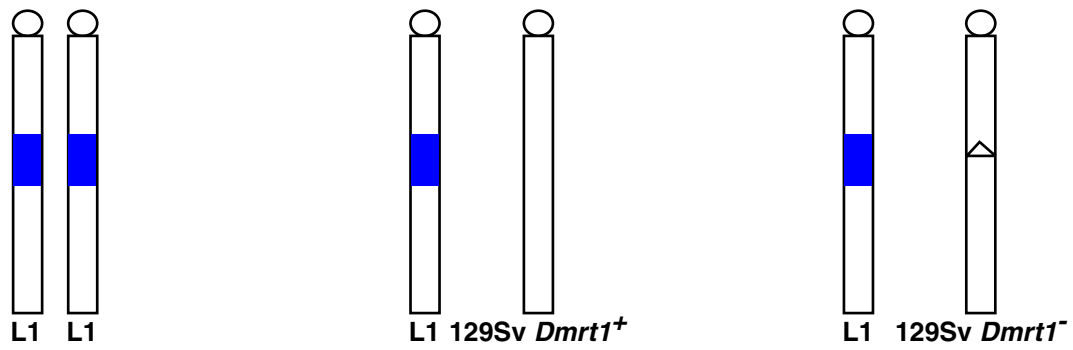

**Fig. S8.** Diagram of complementation test with L1 and 129Sv *Dmrt1*. Blue bar represents region of MOLF-derived DNA substituted for 129Sv DNA in congenic L1 chromosome 19. Triangle indicates position of *Dmrt1* null mutation.

**Table S1. Antibodies**

| Antibody                         | Supplier             | Catalog no.     | Diluton |
|----------------------------------|----------------------|-----------------|---------|
| RET                              | Neuromics            | GT15002         | 1:100   |
| TRA98                            | Bio Academia         | 73-003          | 1:500   |
| BLIMP1/PRDM1                     | Lifespan Biosciences | LC-C2538        | 1:50    |
| Ki67                             | Thermo Scientific    | RM-9106-S1      | 1:250   |
| E-CADHERIN                       | Zymed Laboratories   | 12-1900         | 1:500   |
| DMRT1 140A                       | David Zarkower       |                 | 1:500   |
| STRA8                            | Pierre Chambon       |                 | 1:200   |
| SOX2                             | Chemicon             | AB5603          | 1:300   |
| OCT3/4                           | Santa Cruz           | SC-9081         | 1:150   |
| NANOG                            | Cosmo Bio            | REC-RCAAB0002PF | 1:250   |
| MVH                              | Abcam                | AB13840         | 1:300   |
| P27 <sup>Kip1</sup>              | Santa Cruz           | Sc-528          | 1:100   |
| P-AKT Thr 308                    | Cell Signaling       | 244F9H2         | 1:50    |
| PTEN                             | Cell Signaling       | 138G6           | 1:100   |
| GM114                            | Blanche Capel        |                 | 1:500   |
| Goat $\alpha$ rat Alexa 594      | Molecular Probes     | A11007          | 1:500   |
| Goat $\alpha$ rabbit Alexa 488   | Molecular Probes     | A11034          | 1:500   |
| Goat $\alpha$ mouse Alexa        | Molecular Probes     | A11029          | 1:500   |
| Biotinylated $\alpha$ rabbit IgG | Vector Labs          | BA-1000         | 1:200   |

**Table S2. qRT-PCR primer sequences**

| qRT-PCR                    | Forward                  | Reverse                  |
|----------------------------|--------------------------|--------------------------|
| <i>Ret</i>                 | TTCCGAGGAAATCCCACTT      | CAGGGCTTCCCAATCAGTTA     |
| <i>E-cadherin</i>          | TGAGCTGCCTCAGAAAAACA     | AGCCTGAACCACCAGAGTGT     |
| <i>Sox2</i>                | GAGTGGAACCTTTTGTCCGAGA   | GAAGCGTGTACTTATCCTTCTCAT |
| <i>Oct3/4</i>              | GAAGCAGAAGAGGATCACCTTG   | TTCTTAAGGCTGAGCTGCAAG    |
| <i>Nanog</i>               | CCTCAGCCTCCAGCAGATGC     | CCGCTTGCACTTCATCCTTTG    |
| <i>p15<sup>INK4b</sup></i> | AATAACTTCCTACGCATTTTCTGC | CCCTTGGCTTCAAGGTGAG      |
| <i>P27<sup>Kip1</sup></i>  | TGGAGGGCAGATACGAATG      | CGGGGGCCTGTAGTAGAACT     |
| <i>P18<sup>INK4c</sup></i> | CAGATTAACCATCCCAAGTCCTT  | CCCCTTTCCTTGTCTCTAA      |
| <i>P19<sup>INK4d</sup></i> | AATGTGACCCAAGGCCACT      | TTTCTCTTTTGTGAGAAGTAACC  |
| <i>Mybl2</i>               | AGGACAAGGAACAGCACCAG     | GCAGCTATGGCAATCTCCTC     |
| <i>Klf2</i>                | ACCAAGAGCTCGCACCTAAA     | CTGTGACCTGTGTGCTTTTCG    |
| <i>TdGF1</i>               | GGAAGGCACAACTGGAAAG      | GTTTGAATTTGGACCCGTTG     |
| <i>Zic3</i>                | TCCACAAGAGGACCCATACAG    | TATAGGGCTTGTCCGAGGTG     |
| <i>ss18</i>                | ACTGCTGACCTTGACCCTGA     | ACCTCCACAGCAAGGATACC     |
| <i>Eomes</i>               | CAATGTTTTCGTGGAAGTGG     | GTGGGAGCCAGTGTTAGGAG     |
| <i>Prtg</i>                | GGGGAAGAACCTGGAGAGAG     | GACCGTAGCTATTGATGATCAGG  |
| <i>Jam2</i>                | CCTCCTGATGCTGCTGCT       | TGTGACTTCTTGACGGTGGT     |
| <i>FoxD3</i>               | CAGCAACCGTTTTCCGTACT     | GGGTCCAGGGTCCAGTAGTT     |
| <i>Nr0b1</i>               | TATCTGAAAGGGACCGTGCT     | CAGCGGATCTGATCTGGTACT    |
| <i>Eras</i>                | CCTCTGGAGATCTGGTGCAT     | GCCCCTCATCAGACTGCTAC     |
| <i>HPRT</i>                | TCCTCCTCAGACCGCTTTT      | CCTGGTTCATCATCGCTAATC    |

Table S3. CHIP primer sequences

| ChIP primers                 | Forward              | Reverse               | Size | Distance from transcription start |          |
|------------------------------|----------------------|-----------------------|------|-----------------------------------|----------|
|                              |                      |                       |      | F primer                          | R primer |
| <i>Sox2 4</i>                | CAGCAGCCACATCTCAGAAA | TTTTCTCCTTAATCGGGGTGT | 125  | -2,104                            | -1,980   |
| <i>Sox2 5</i>                | ATAAGTCCTTCCGGGTTC   | ATGCCCACTTAGACCCAGA   | 148  | -1,937                            | -1,790   |
| <i>Sox2 2</i>                | AGCCAAGCCTGGGAGAAT   | GCTCCGCTCATTGCCTTAC   | 108  | -1,766                            | -1,659   |
| <i>Sox2 6</i>                | GGGCAGAGAGGGAAGGATAA | TTTTTCCCTGCAATACTCTCG | 135  | -1,710                            | -1,568   |
| <i>Sox2 3</i>                | TGGCATCAGGACTTTCTTC  | GCCCCGTCTAAGTTTCCTTC  | 100  | -1,499                            | -1,400   |
| <i>p19<sup>INK4d</sup> 2</i> | GGGCCATCTTGGATCTTTA  | GCGCTTACCCTCAGAAGC    | 189  | -408                              | -596     |
| <i>p19<sup>INK4d</sup> 4</i> | TTGTCTCTCCGTAGCAGTG  | CGCTGGGGTCAGTTAAACC   | 141  | -243                              | -383     |
| <i>p19<sup>INK4d</sup> 1</i> | GACTCACCTCCCTCCTTC   | GGCTCTCGCTACTCTGTTGC  | 160  | -6                                | -165     |
| <i>p19<sup>INK4d</sup> 3</i> | CCTCCATTGTCACAAAAGCA | GATCCAACCTCCCAAAATGA  | 119  | 259                               | 157      |
| <i>Btg2</i>                  | GACACTGACAGAGCCGTTC  | ACACTCCTCCACCAAACAG   | 208  | -357                              | -564     |

All CHIP qPCR reactions performed in the presence of 0.5 M Betain.
